# Supplementary material for: A bacterial toxin-antitoxin module is the origin of inter-bacterial and inter-kingdom effectors of Bartonella
Source: PubMed Central journal article supplement (PMC5675462; doi:10.1371/journal.pgen.1007077), 2017-10-26
Supplement: pgen.1007077.s004.pdf [file pgen.1007077.s004.pdf]

**Table S1. List of all oligonucleotide primers used in this study**

| <i>Primer name</i> | <i>Sequence (5'-3')</i>                                                              |
|--------------------|--------------------------------------------------------------------------------------|
| prAH402            | GAGCGGAGATCTATGGCCTACCCATACGATGTTCCAGATTACGCGGCCGCGATGTTGAGTGAAGACGAAATTA            |
| prAH403            | CTCCCGCCTCGAGTTATATTTCTCCACGTTTTATCC                                                 |
| prAH404            | GAGCGGCTGCAGGTGGAGAAATATAAGGGGG                                                      |
| prAH405            | CTCCCGCGCGCCGCTTATAAGAGATTGAGGTTTTGAC                                                |
| prAH443            | ATGCCTTGCCCCCTTTCGAGAGGGAAATG                                                        |
| prAH444            | CGAAAGGGGGCCAAGGCATTCAACTCTCCC                                                       |
| prAH498            | GAGCGGGGTACCATAGGAGGAACAATATGTTGAGTGAAGACGAAATTA                                     |
| prAH499            | CTCCCGCAAGCTTTTATATTTCTCCACGTTTTATCC                                                 |
| prAH523            | GAGCGGGGTACCATAGGAGGAACAATTTTGTGGAGAAATATAAGGGGG                                     |
| prAH524            | CTCCCGCCTCGAGTTATAAGAGATTGAGGTTTTGAC                                                 |
| prAH547            | AGATATACATATGGCCTACCCATACGATGTAGAT                                                   |
| prAH548            | GGTAGGCCATATGTATATCTCCTTCTTACTTA                                                     |
| prAH939            | GAGCGGTCTAGAGCTCATAGGAGGAACAATATGCAGTTAAAGTTTACACCTATAAA                             |
| prAH940            | CTCCCGCAAGCTTGGCGCCGCTCGAGGTACCATCGATTATATCCCCAGAATCAGG                              |
| prAH1113           | ATGTATTTAGCCATGTCAGCCGTTAAGTG                                                        |
| prAH1114           | CATGGCTAAATACATTCAAATATGTATCCGCT                                                     |
| prAH1115           | GAGCGGCTGCAGGTAGCGATAGCGGAGTGTATACT                                                  |
| prAH1116           | CTCCCGCGGTACCGTTCAGTAATTCCTGCATTG                                                    |
| prAH1117           | GAGCGGCAATTGTAGGAGCACAAAATGTCCAATTTACTGACCG                                          |
| prAH1118           | CTCCCGCAATTCGCTGCCACCGCCACCGCTATCGCCATCTCCAGC                                        |
| prAH1123           | AACAGCGAGGCAGCATGAAGAACGACAGGACTTTG                                                  |
| prAH1124           | CTGCCTCGCTGTTGCACAAAGTAGGGTCGGGATT                                                   |
| prAH1181           | GAGCGGGAATTCATTGCCAAGCACGCTCC                                                        |
| prAH1182           | CTCCCGCCTCGAGCAATTGTCATCTACTCCTACCTCGGG                                              |
| prAH1238           | GACGCCATGCATCAGGAGGGACAGCTGATAG                                                      |
| prAH1239           | CTCGGCCTGCAGCGGGAATTTGAAGACAATAAC                                                    |
| prAH1240           | GACGCCCTGCAGGAAAGTTCTTTACCCTCAGC                                                     |
| prAH1241           | CTCGGCGATGCATGCGGATACATATTTGAATGTATTTAGA                                             |
| prAH1242           | GACGCCGTCGACTACTGCCCGCTTTC                                                           |
| prAH1243           | GACGCCCTGCAGTATGAGTCAGCAACACCTTCT                                                    |
| prAH1244           | GAACGGCCTCGAGCGCAC AAGTCCTAAGTTACG                                                   |
| prAH1245           | CATCGATTAATCGCCATCTTCCAGCA                                                           |
| prAH1246           | TGGCGATTAATCGATGGTACCTCGAGC                                                          |
| prAH1247           | GACAGGGGAATTCGCAATAGCGCATTTATCAGC                                                    |
| prAH1248           | CTCCCGCCTCGAGTTACCTTGTAATTCCTTTGAAGG                                                 |
| prAH1249           | GAGCGGCGAATTCAGGAAATATGAGGGTAGCAACG                                                  |
| prAH1267           | GATAGGTGAAGTAGGCCACCCGCGAGCGGGTGTCTTCTTCTACTGTCCCTTATTCGGTTTTCCAGTCACGAC             |
| prAH1268           | CGCGGGTGGGCCTACTTACCTATCCTGCCCGGCTGACGCCGTTGGATACACCAAGGAAAGTCTACAGCGTAATAGCGAAGAGGC |
| prAH1300           | CCGCTGGACTCGAGTTATTGAACAAGATGGATTGCA                                                 |
| prAH1301           | CTCCCGGAATTCATGCGAAACGATCCTC                                                         |
| prAH1302           | GAGCGGGAATTCATTACCTCATATAGCATACTATACGAAGTTATCGTAGAAGAACAGCAAGGC                      |
| prAH1303           | CTCCCGCTCGAGATAACTTCGTATAATGTATGCTATACGAAGTTATCTATTGCGATAACAAGAAAAAGC                |
| prAH1321           | GGTGTGGACCTGCAGGCTAAAGGAAGCGGAACAC                                                   |
| prAH1322           | CTCCAGCGGCCGCGGAATTC AAGATCCCCTTATTAG                                                |

|          |                                                                         |
|----------|-------------------------------------------------------------------------|
| prAH1393 | ACGAATTCCCGTCGTGACTGGGAAAACC                                            |
| prAH1394 | GTCACGACGGGAATTCGTAATCATGGTC                                            |
| prAH1435 | GAACCTCGGAATTCAGTATTGCGCAGGTCAGAT                                       |
| prAH1436 | CTCCGGTCTCGAGCGTTTGTCTTCTGTATCAGTC                                      |
| prAH1441 | ACAAGTAATGTGCGCACACTACATCCCTGATACGAAACAAAGTTAACTTATCAGGAGGGACAGCTGATAG  |
| prAH1442 | CAGGTTGACTTTTCAGAATAGGGGCAGTTTGGTGATCGTCCAGTATATCGGGAATTTGAGACAATAAC    |
| prJK071  | GGAGCGGTATTTTCTATAAAACTTACCGCTTATTTGAGATATTCATCGAAATTCGGGGATCCGTCGACC   |
| prJK072  | TAAGGCGCAGCCGCATCCGGCCTGATATTTCACTCAAAAATAGTCCATATCTGTAGGCTGGAGCTGCTTCG |
| prJK073  | TCAATAAAAGTAGTATTGTCGTGAAAAATTGATTAAGATTAATATTATGATTCGGGGATCCGTCGACC    |
| prJK074  | CGTCTTAAATGTGACTTTAATAAATAATTTTATTTCTGTAATCGGTTTATTGTAGGCTGGAGCTGCTTCG  |
| prJK106  | ACTATTGCAACAGTGCCGTTGATCGTGCTATGATCGACTGATGTCATCACGACATCATAACGGTTCTGG   |
| prJK110  | TCTGCTGTAGTGAGTGGGTTGCGCTCCGGCAGCGGTCCTGATCATGAGCTGGAATCGAAATCTCGTGATG  |
| prJK111  | ACTATTGCAACAGTGCCGTTGATCGTGCTATGATCGACTGATGTCATCACACAGCCATACCACAGCTTC   |
| prJK112  | TCTGCTGTAGTGAGTGGGTTGCGCTCCGGCAGCGGTCCTGATCATGAGCTCTTACATTAATTGCGTTGCG  |
| prMQ1681 | TAACAATATGTTGTGTCGAATTTGAGCGGATAACAATTTCTCACAGGAAACAGCTATGACC           |
| prMQ1682 | CCGCTCACAAATTCGACACAACATATTGTTATCCGCTCACAAAGTAAAGCCTGGGGTGCCTAG         |
| prPE506  | CGGGATCCAACCTCGCCGGCAGTTTGTG                                            |
| prPE507  | ATGAGGAAAATTTTACTAACAATAG                                               |
| prPE508  | GTTAGTAAAATTTCTCATTTTAGCTCCTCATAATTACGG                                 |
| prPE509  | CGGGATCCTGAATGCTATGACGGGAACC                                            |
| prPE511  | AAGGTAAAATTTCTTTAAACGAT                                                 |
| prPE609  | CGGGATCCTGTTGATTGTTATCTCAACAAG                                          |
| prPE610  | ATCGTTTAAAAGAATTTTACCTTTAACCTGATATTTTAGCTAAAGCGC                        |
| prPE611  | CGGGATCCGTTTTATCCGTTCCATCAAATCC                                         |
